# Supplementary material for: Association Study of IL-12B Polymorphisms Susceptibility with Ankylosing Spondylitis in Mainland Han Population
Source: PLoS One. 2015 Jun 23;10(6):e0130982. doi: 10.1371/journal.pone.0130982 (PMC4477880; doi:10.1371/journal.pone.0130982)
Supplement: S1 Supporting Data — (XLS) [file pone.0130982.s002.xls]

## Sheet: genotyping data
Simple Name	rs10045431	rs11167764	rs3212227	rs6556412	rs6556416	rs6871626	rs6887695	rs7709212	group
A1001	C/C	C/C	G/T	G/G	C/C	C/A	G/G	T/T	1
A1002	C/C	C/C	G/T	G/A	C/C	C/C	G/C	C/T	1
A1003	C/A	C/C	G/T	G/A	C/A	C/C	G/C	C/T	1
A1004	C/C	C/C	G/G	A/A	C/C	C/C	C/C	C/C	1
A1005	C/A	C/C	G/T	G/G	C/A	C/C	G/G	C/T	1
A1007	C/C	C/A	G/T	A/A	C/C	C/A	C/C	C/C	1
A1008	C/A	C/C	G/T	G/A	C/A	C/C	G/C	C/T	1
A1010	C/C	C/A	G/G	G/A	C/C	C/C	G/C	C/T	1
A1011	C/C	C/C	G/T	G/G	C/C	C/C	G/G	T/T	1
A1013	C/C	C/C	G/T	G/A	C/C	C/A	G/C	C/T	1
A1014	C/C	C/C	T/T	G/G	C/C	C/A	G/G	T/T	1
A1015	C/C	C/C	G/G	A/A	C/C	C/A	C/C	C/C	1
A1016	C/A	C/A	G/T	G/A	C/A	C/A	G/C	C/T	1
A1017	C/C	C/C	T/T	G/A	C/C	C/C	G/C	C/T	1
A1018	C/C	C/C	G/T	G/A	C/C	C/A	G/C	C/T	1
A1019	C/C	C/A	T/T	G/G	C/C	C/A	G/G	T/T	1
A1020	C/C	C/C	G/T	G/A	C/C	C/C	G/C	C/T	1
A1021	C/C	C/C	G/T	G/A	C/C	C/A	G/C	C/T	1
A1022	C/C	C/C	T/T	A/A	C/C	A/A	C/C	C/C	1
A1024	C/C	C/C	T/T	G/A	C/C	C/A	G/C	C/T	1
A1025	C/C	C/C	G/G	A/A	C/C	A/A	C/C	C/C	1
A1026	C/C	C/A	G/T	G/A	C/C	C/A	G/C	C/T	1
A1027	C/C	C/C	G/T	A/A	C/C	A/A	C/C	C/T	1
A1028	C/A	C/C	G/T	G/G	C/A	C/C	G/G	T/T	1
A1029	C/C	C/A	G/G	A/A	C/C	C/A	C/C	C/C	1
A1030	C/C	C/C	T/T	G/G	C/C	C/C	G/G	T/T	1
A1031	C/A	C/C	T/T	G/G	C/A	A/A	G/G	T/T	1
A1032	C/A	C/C	G/T	G/G	C/A	C/C	G/G	T/T	1
A1033	C/C	C/C	G/G	A/A	C/C	C/A	C/C	C/C	1
A1034	C/C	C/C	G/T	G/A	C/C	A/A	G/C	C/T	1
A1036	C/A	C/C	G/T	G/A	C/A	C/C	G/C	C/T	1
A1037	A/A	C/C	G/T	G/G	A/A	C/A	G/G	T/T	1
A1038	C/C	C/C	T/T	G/A	C/C	C/C	G/C	T/T	1
A1039	C/C	C/C	G/T	G/A	C/C	C/A	G/C	C/T	1
A1040	C/A	C/A	T/T	G/G	C/A	A/A	G/G	T/T	1
A1041	C/C	C/C	G/T	G/A	C/C	C/A	G/C	C/T	1
A1042	C/C	C/C	T/T	A/A	C/C	C/C	G/C	C/C	1
A1043	C/C	C/C	G/T	G/A	C/C	A/A	G/C	C/T	1
A1044	C/A	C/A	G/G	G/A	C/A	C/C	G/C	C/T	1
A1045	C/C	C/C	T/T	G/G	C/C	C/C	G/G	T/T	1
A1046	C/A	C/A	T/T	G/G	C/A	C/C	G/G	T/T	1
A1047	C/C	C/C	G/G	A/A	C/C	C/C	C/C	C/C	1
A1048	C/A	C/C	G/T	G/A	C/A	C/C	G/C	C/T	1
A1049	C/A	C/C	G/T	G/A	C/A	C/C	G/C	C/T	1
A1050	C/C	C/C	T/T	G/G	C/C	C/C	G/G	T/T	1
A1052	C/A	C/C	G/T	G/A	C/A	C/C	G/C	C/T	1
A1053	C/A	C/A	G/T	G/A	C/A	C/A	G/C	C/T	1
A1054	C/C	C/C	G/G	G/A	C/C	C/C	G/C	C/T	1
A1055	C/C	C/A	G/G	A/A	C/C	C/A	C/C	C/C	1
A1056	C/A	C/C	G/T	G/A	C/A	A/A	G/C	C/T	1
A1057	C/C	C/A	T/T	G/G	C/C	C/C	G/G	T/T	1
A1058	C/C	C/C	G/T	G/A	C/C	C/C	G/C	C/T	1
A1059	C/C	C/C	G/T	G/A	C/C	C/A	G/C	C/T	1
A1060	C/A	C/C	G/T	G/A	C/A	A/A	G/C	C/T	1
A1062	C/C	C/A	G/T	A/A	C/C	C/A	G/C	C/C	1
A1065	C/C	C/A	T/T	G/A	C/C	C/C	G/C	C/T	1
A1066	A/A	C/C	T/T	G/G	A/A	C/C	G/G	T/T	1
A1067	C/A	C/C	T/T	G/G	C/A	C/A	G/G	T/T	1
A1068	C/C	C/C	G/G	A/A	C/C	C/A	C/C	C/C	1
A1069	C/C	C/A	G/T	G/A	C/C	C/A	G/C	C/T	1
A1070	C/C	C/C	G/T	G/A	C/C	A/A	G/C	C/T	1
A1071	C/C	C/C	G/G	G/A	C/C	C/A	G/C	C/T	1
A1072	C/C	C/C	G/T	G/A	C/C	C/C	G/C	C/T	1
A1074	C/C	C/A	G/G	G/A	C/C	C/A	G/C	C/T	1
A1075	C/C	C/A	G/G	A/A	C/C	C/A	C/C	C/C	1
A1076	C/C	C/C	T/T	G/A	C/C	A/A	G/C	T/T	1
A1077	C/C	C/C	T/T	G/G	C/C	C/C	G/G	T/T	1
A1079	C/A	C/C	T/T	G/G	C/A	C/C	G/G	T/T	1
A1080	C/C	C/C	G/G	G/A	C/C	C/A	G/C	C/C	1
A1081	C/C	C/C	G/T	G/A	C/C	C/C	G/C	C/T	1
A1083	C/C	C/A	G/T	A/A	C/C	C/A	C/C	C/C	1
A1084	C/C	C/C	G/G	A/A	C/C	C/A	C/C	C/C	1
A1086	C/C	C/C	G/T	G/A	C/C	C/C	G/C	C/T	1
A1087	C/C	C/A	G/T	G/A	C/C	C/A	G/C	C/T	1
A1089	C/C	C/C	T/T	G/A	C/C	C/A	G/C	C/T	1
A1090	C/C	A/A	T/T	G/G	C/C	C/C	G/G	T/T	1
A1092	C/A	C/C	T/T	G/G	C/A	C/C	G/G	T/T	1
A1095	C/C	C/A	G/T	G/A	C/C	C/C	G/G	C/C	1
A1098	C/C	C/C	G/G	A/A	C/C	C/A	G/C	C/C	1
A1099	C/C	C/C	G/T	G/A	C/C	C/C	G/C	C/T	1
A1100	C/C	C/C	T/T	G/A	C/C	C/A	G/C	C/T	1
A1101	C/C	C/C	G/T	A/A	C/C	C/C	C/C	C/T	1
A1102	C/C	C/C	G/G	G/A	C/C	C/A	G/C	C/T	1
A1103	C/C	C/A	G/G	G/A	C/C	C/C	G/C	C/C	1
A1104	C/A	C/C	T/T	G/G	C/A	C/C	G/G	T/T	1
A1105	C/C	C/A	G/T	G/A	C/C	C/A	G/C	C/T	1
A1106	C/C	A/A	G/T	G/G	C/C	C/C	G/G	T/T	1
A1107	C/C	C/C	G/G	G/A	C/C	C/C	G/C	C/T	1
A1108	C/C	C/C	G/T	G/A	C/C	C/A	G/C	C/T	1
A1110	C/C	C/C	G/T	G/A	C/C	C/C	G/C	C/T	1
A1111	C/C	C/C	G/T	G/A	C/C	C/A	G/C	C/T	1
A1113	C/C	C/C	T/T	G/G	C/C	C/A	G/G	T/T	1
A1114	C/C	C/C	T/T	G/G	C/C	C/C	G/G	T/T	1
A1115	C/A	C/A	G/G	G/A	C/A	C/A	G/C	C/C	1
A1116	C/C	C/C	T/T	G/G	C/C	C/C	G/G	T/T	1
A1117	C/C	C/C	G/T	A/A	C/C	C/A	C/C	C/C	1
A1119	C/C	C/C	G/T	G/A	C/C	C/A	G/C	C/T	1
A1120	C/C	C/C	G/G	A/A	C/C	A/A	C/C	C/C	1
A1122	C/C	C/C	G/G	G/A	C/C	C/A	G/C	C/T	1
A1123	C/C	C/C	T/T	G/A	C/C	C/C	G/G	C/T	1
A1125	C/C	C/C	G/G	A/A	C/C	A/A	C/C	C/C	1
A1126	C/C	C/C	T/T	G/G	C/C	C/C	G/G	T/T	1
A1127	C/C	C/A	G/T	G/G	C/C	C/C	G/G	C/T	1
A1128	C/C	C/C	G/T	G/G	C/C	C/C	G/G	T/T	1
A1129	C/C	C/A	T/T	G/G	C/C	C/C	G/G	T/T	1
A1132	C/C	C/A	G/T	G/A	C/C	C/A	G/C	C/T	1
A1133	C/C	C/A	G/T	G/A	C/C	C/A	G/C	C/T	1
A1134	C/C	C/C	G/T	G/A	C/C	C/C	G/C	C/T	1
A1135	C/C	C/C	G/T	G/A	C/C	C/A	G/C	C/T	1
A1136	C/C	C/C	G/T	G/G	C/C	C/C	G/G	T/T	1
A1137	C/C	C/C	G/T	G/A	C/C	C/A	G/C	C/T	1
A1138	A/A	C/A	T/T	G/G	A/A	C/C	G/G	T/T	1
A1139	C/C	C/A	G/T	G/G	C/C	C/A	G/G	T/T	1
A1140	C/C	C/C	G/G	A/A	C/C	A/A	C/C	C/C	1
A1141	C/C	C/A	G/T	G/A	C/C	C/C	G/C	C/T	1
A1142	C/C	C/A	G/T	G/A	C/C	C/A	G/C	C/T	1
A1143	C/A	C/C	G/T	G/A	C/A	A/A	G/C	C/T	1
A1144	C/C	C/C	G/G	A/A	C/C	C/A	C/C	C/C	1
A1145	C/A	C/C	T/T	G/A	C/A	C/A	G/C	C/T	1
A1146	C/C	C/C	T/T	G/G	C/C	C/C	G/G	T/T	1
A1147	C/C	C/C	G/T	G/A	C/C	C/A	G/C	C/T	1
A1148	C/C	C/A	G/G	A/A	C/C	C/A	C/C	C/C	1
A1149	C/C	C/C	G/T	G/G	C/C	C/C	G/G	T/T	1
A1150	C/A	C/C	T/T	G/A	C/A	C/C	G/C	C/T	1
A1151	C/C	C/C	T/T	G/G	C/C	C/C	G/G	T/T	1
A1152	C/C	C/C	T/T	G/G	C/C	C/C	G/G	T/T	1
A1153	C/C	C/C	G/T	G/A	C/C	C/C	G/C	C/T	1
A1155	C/C	C/C	G/G	A/A	C/C	C/A	C/C	C/C	1
A1156	C/C	C/C	G/T	G/A	C/C	C/C	G/C	C/T	1
A1157	C/C	C/C	T/T	G/G	C/C	C/A	G/G	T/T	1
A1158	C/C	C/C	G/T	G/A	C/C	C/A	G/C	C/T	1
A1159	C/A	C/A	G/T	G/G	C/A	C/C	G/G	C/T	1
A1161	C/C	C/C	T/T	G/G	C/C	C/A	G/G	T/T	1
A1162	C/C	C/C	G/G	A/A	C/C	A/A	C/C	C/C	1
A1163	C/C	C/C	G/T	G/A	C/C	C/A	G/C	C/T	1
A1165	C/C	C/C	G/T	G/G	C/C	C/C	G/G	T/T	1
A1166	C/C	C/C	G/G	A/A	C/C	C/A	C/C	C/C	1
A1167	C/C	C/C	G/G	G/A	C/C	C/C	G/C	C/C	1
A1168	C/C	C/C	G/T	G/G	C/C	C/A	G/G	C/T	1
A1169	C/A	C/A	T/T	G/A	C/A	C/C	G/G	C/T	1
A1170	C/C	C/C	T/T	G/A	C/C	C/C	G/C	C/T	1
A1172	C/C	C/C	T/T	G/G	C/C	C/C	G/G	T/T	1
A1173	C/C	C/C	G/T	G/A	C/C	C/A	G/C	C/T	1
A1175	C/C	C/C	G/T	A/A	C/C	C/A	C/C	C/C	1
A1176	C/C	C/C	G/T	G/G	C/C	C/C	G/G	T/T	1
A1178	C/C	C/C	G/T	G/G	C/C	C/C	G/G	T/T	1
A1179	C/A	C/C	G/T	G/A	C/A	A/A	G/C	C/T	1
A1180	C/C	C/C	G/T	G/A	C/C	C/C	G/C	C/T	1
A1181	C/A	C/A	T/T	G/G	C/A	A/A	G/G	T/T	1
A1182	A/A	C/C	T/T	G/G	A/A	C/C	G/G	T/T	1
A1183	C/C	C/C	G/T	G/A	C/C	C/A	G/C	C/T	1
A1184	C/A	C/A	T/T	G/G	C/A	C/A	G/G	T/T	1
A1185	C/C	C/C	T/T	G/G	C/C	C/C	G/G	T/T	1
A1187	C/C	A/A	G/T	G/A	C/C	C/A	G/C	C/C	1
A1191	C/C	C/C	T/T	G/A	C/C	C/C	G/C	C/T	1
A1192	C/A	C/C	G/T	G/A	C/A	C/C	G/C	C/T	1
A1193	C/C	C/C	G/T	G/A	C/C	C/A	G/C	C/T	1
A1195	C/C	C/C	T/T	G/G	C/C	C/C	G/G	T/T	1
A1197	C/C	C/C	T/T	G/G	C/C	C/C	G/G	T/T	1
A1198	C/C	C/C	T/T	G/G	C/C	C/C	G/G	T/T	1
A1199	C/C	C/C	G/T	G/A	C/C	A/A	G/C	C/T	1
A1200	C/C	C/A	G/T	G/A	C/C	C/A	G/C	C/T	1
A1202	C/C	C/C	G/G	G/A	C/C	A/A	G/C	C/C	1
A1203	C/C	C/A	G/T	G/G	C/C	C/C	G/G	C/T	1
A1204	C/C	C/C	T/T	G/A	C/C	C/C	G/C	T/T	1
A1205	C/C	C/C	T/T	G/G	C/C	C/C	G/G	T/T	1
A1206	C/C	C/C	G/T	G/A	C/C	C/C	G/C	C/T	1
A1207	C/C	C/C	G/T	A/A	C/C	C/A	C/C	C/T	1
A1208	C/C	C/C	G/T	G/A	C/C	C/A	G/C	C/T	1
A1209	C/C	C/A	G/G	G/A	C/C	C/C	G/C	C/C	1
A1210	C/C	C/A	G/T	G/G	C/C	C/C	G/G	C/T	1
A1211	C/C	C/A	G/T	A/A	C/C	A/A	C/C	C/C	1
A1212	C/C	C/A	G/T	A/A	C/C	A/A	C/C	C/C	1
A1213	C/A	C/C	G/T	G/A	C/A	C/C	G/C	C/T	1
A1214	C/C	C/C	G/T	G/A	C/C	C/C	G/C	C/T	1
A1215	C/C	C/C	G/T	G/G	C/C	A/A	G/G	T/T	1
A1216	C/C	C/C	T/T	G/G	C/C	C/A	G/G	T/T	1
A1217	C/C	C/A	T/T	G/G	C/C	C/C	G/G	T/T	1
A1218	C/A	C/C	T/T	G/G	C/A	C/C	G/G	T/T	1
A1219	C/C	C/C	T/T	G/G	C/C	C/C	G/G	T/T	1
A1220	C/A	C/C	T/T	G/G	C/A	C/C	G/G	T/T	1
A1221	C/C	C/A	G/G	G/A	C/C	C/A	G/C	C/C	1
A1222	C/C	C/A	G/T	G/A	C/C	C/A	G/C	C/T	1
A1223	C/C	C/C	G/T	G/A	C/C	C/C	G/C	C/T	1
A1224	C/C	C/A	G/G	A/A	C/C	C/A	C/C	C/C	1
A1225	C/C	C/C	G/T	G/A	C/C	C/A	G/C	C/T	1
A1226	C/C	C/C	T/T	G/G	C/C	C/C	G/G	T/T	1
A1227	C/C	C/C	G/G	A/A	C/C	C/C	C/C	C/C	1
A1228	C/C	C/C	G/T	G/A	C/C	C/A	G/C	C/T	1
A1229	C/C	C/A	G/G	A/A	C/C	A/A	C/C	C/C	1
A1230	C/C	C/C	G/T	G/A	C/C	C/A	G/C	C/T	1
A1231	C/C	C/C	G/T	G/G	C/C	C/C	G/G	T/T	1
A1232	C/C	C/C	T/T	G/G	C/C	C/C	G/G	T/T	1
A357	C/C	C/C	G/T	G/A	C/C	C/C	G/C	C/T	1
A358	C/C	C/A	G/T	A/A	C/C	C/A	C/C	C/C	1
A359	C/C	C/A	G/T	G/A	C/C	C/A	G/C	C/T	1
A360	C/C	C/C	G/T	G/A	C/C	A/A	G/C	C/T	1
A361	C/C	C/C	G/T	G/A	C/C	C/C	G/C	C/T	1
A363	C/A	C/C	G/T	G/A	C/A	C/A	G/C	C/T	1
A364	C/A	C/C	T/T	G/G	C/A	C/A	G/G	T/T	1
A365	C/C	C/A	G/T	G/A	C/C	A/A	G/C	C/T	1
A366	C/C	C/C	G/T	G/A	C/C	C/C	G/C	C/T	1
A367	C/C	C/C	T/T	G/G	C/C	C/C	G/G	T/T	1
A368	C/A	C/C	G/T	G/A	C/A	C/A	G/C	C/T	1
A369	C/C	C/C	G/T	G/A	C/C	C/A	G/C	C/T	1
A370	C/C	C/C	G/T	G/A	C/C	C/C	G/C	C/T	1
A371	A/A	C/C	T/T	G/G	A/A	A/A	G/G	T/T	1
A434	C/C	C/A	G/G	A/A	C/C	A/A	C/C	C/C	1
A435	C/C	C/C	G/T	A/A	C/C	C/A	C/C	C/C	1
A436	C/C	C/A	T/T	G/A	C/C	C/C	G/C	C/T	1
A509	C/C	C/C	T/T	G/A	C/C	C/A	G/C	C/T	1
A511	C/C	C/C	G/G	G/A	C/C	C/A	G/C	C/T	1
A513	C/C	C/C	T/T	G/G	C/C	C/C	G/G	C/T	1
A515	C/A	C/C	G/G	G/A	C/A	C/A	G/C	C/T	1
A516	C/C	C/C	G/T	G/A	C/C	C/A	G/C	C/T	1
A518	C/C	C/C	G/G	A/A	C/C	C/A	C/C	C/C	1
A519	C/C	C/C	G/G	G/A	C/C	C/C	G/C	C/T	1
A520	C/C	C/C	G/T	A/A	C/C	C/A	C/C	C/C	1
A522	C/C	C/A	G/T	G/A	C/C	C/A	G/C	C/T	1
A523	C/C	C/C	G/T	A/A	C/C	C/C	C/C	C/C	1
A527	C/C	C/C	G/T	A/A	C/C	C/C	G/C	C/C	1
A529	C/C	C/C	G/G	A/A	C/C	C/A	C/C	C/C	1
A533	C/C	C/C	T/T	G/G	C/C	C/C	G/G	T/T	1
A535	C/C	C/A	T/T	G/G	C/C	C/C	G/G	T/T	1
A536	C/C	C/C	G/T	A/A	C/C	A/A	C/C	C/C	1
A539	C/C	C/C	G/T	G/A	C/C	C/C	G/C	C/T	1
A557	C/A	C/C	T/T	G/G	C/A	C/C	G/G	T/T	1
A560	C/C	C/C	T/T	G/G	C/C	C/C	G/G	T/T	1
A564	C/C	C/C	G/T	G/A	C/C	C/C	G/C	C/T	1
A566	C/C	C/C	G/T	G/A	C/C	C/A	G/C	C/T	1
A567	A/A	C/C	G/G	A/A	C/C	C/C	G/G	C/C	1
A568	C/C	C/C	T/T	A/A	C/C	C/A	G/C	C/T	1
A569	C/C	C/C	G/G	A/A	C/C	C/A	C/C	C/C	1
A570	C/C	C/A	T/T	G/A	C/C	C/C	G/G	C/T	1
A571	C/A	C/C	T/T	G/G	C/A	C/C	G/G	T/T	1
A573	C/A	C/A	T/T	G/G	C/A	C/C	G/G	T/T	1
A574	C/C	C/C	G/G	A/A	C/C	C/A	C/C	C/C	1
A575	C/C	C/A	G/T	G/G	C/C	C/C	G/G	C/T	1
A576	C/A	C/C	G/T	G/A	C/A	C/A	G/C	C/T	1
A578	C/C	C/C	G/G	G/A	C/C	C/A	G/C	C/T	1
A591	C/C	C/A	G/T	G/A	C/C	C/A	G/C	C/T	1
A592	C/C	C/C	G/T	G/A	C/C	C/A	G/C	C/T	1
A593	C/C	C/C	T/T	G/A	C/C	C/A	G/G	C/T	1
A594	C/C	C/C	G/T	A/A	C/C	C/C	C/C	C/C	1
A595	C/C	C/A	G/T	G/G	C/C	C/C	G/G	T/T	1
A596	C/A	C/C	G/T	G/A	C/A	C/C	G/C	C/T	1
A597	C/C	C/A	G/T	G/A	C/C	C/C	G/G	C/C	1
A598	C/C	C/C	G/T	G/A	C/C	C/C	G/C	C/T	1
A599	C/C	C/C	T/T	G/A	C/C	C/C	G/C	T/T	1
A603	C/A	C/A	G/T	G/G	C/A	C/A	G/G	T/T	1
A604	C/C	C/C	T/T	G/A	C/C	C/C	G/C	C/T	1
A605	C/C	C/C	T/T	G/A	C/C	C/C	G/C	C/T	1
A606	C/C	C/C	G/G	G/A	C/C	C/A	G/C	C/T	1
A607	C/C	C/C	T/T	G/G	C/C	C/C	G/G	T/T	1
A608	C/A	C/C	G/T	G/A	C/A	C/C	G/C	C/T	1
A609	C/C	C/C	T/T	G/A	C/C	C/C	G/G	C/T	1
A610	C/A	C/A	T/T	G/G	C/A	C/C	G/G	T/T	1
A611	C/C	C/C	G/T	G/A	C/C	C/A	G/C	C/T	1
A614	C/C	C/C	T/T	G/G	C/C	C/C	G/G	T/T	1
A615	C/C	C/C	G/T	A/A	C/C	C/C	C/C	C/C	1
A616	C/C	C/A	T/T	G/G	C/C	C/A	G/G	T/T	1
A617	C/C	C/C	T/T	G/G	C/C	C/C	G/G	T/T	1
A650	C/C	C/C	T/T	G/G	C/C	C/C	G/G	T/T	1
A651	C/C	C/C	T/T	G/A	C/C	A/A	G/C	T/T	1
A653	C/C	C/C	G/G	A/A	C/C	C/A	C/C	C/C	1
A660	C/C	C/A	G/T	G/A	C/C	C/A	G/C	C/T	1
A663	C/C	C/C	G/T	A/A	C/C	A/A	C/C	C/C	1
A664	C/C	C/A	T/T	G/G	C/C	C/C	G/G	T/T	1
A665	C/A	C/A	G/T	G/A	C/A	A/A	G/C	C/T	1
A666	C/C	C/C	T/T	A/A	C/C	C/A	C/C	T/T	1
A668	C/C	C/C	G/T	G/A	C/C	C/A	G/C	C/T	1
A669	C/C	C/C	G/G	G/A	C/C	C/C	G/C	T/T	1
A670	C/C	C/C	T/T	G/G	C/C	C/A	G/G	T/T	1
A671	C/C	C/C	G/G	G/A	C/C	C/C	G/C	C/T	1
A672	C/C	C/C	G/T	G/A	C/C	C/C	G/C	C/T	1
A673	C/C	C/C	G/G	A/A	C/C	C/C	C/C	C/C	1
A674	C/C	C/C	T/T	G/G	C/C	C/A	G/G	T/T	1
A675	C/C	C/C	G/T	G/A	C/C	C/C	G/C	C/T	1
A676	C/C	C/C	G/T	G/G	C/C	C/A	G/G	C/T	1
A677	C/C	C/C	T/T	G/G	C/C	C/C	G/G	T/T	1
A678	C/C	C/C	T/T	G/G	C/C	C/C	G/G	T/T	1
A679	C/C	C/A	G/T	G/G	C/C	C/C	G/G	C/T	1
A681	A/A	C/A	G/T	G/G	A/A	C/C	G/G	C/T	1
A682	C/A	C/C	G/T	G/A	C/A	C/A	G/C	C/T	1
A683	C/C	C/A	G/G	G/A	C/C	C/A	G/C	C/C	1
A685	C/A	C/A	T/T	G/G	C/A	C/C	G/G	T/T	1
A686	C/A	C/C	T/T	G/G	C/A	C/A	G/G	T/T	1
A687	C/A	C/A	G/G	G/A	C/A	A/A	G/C	C/T	1
A688	C/A	C/C	G/T	G/A	C/A	C/C	G/C	C/T	1
A690	C/C	C/C	G/T	G/G	C/C	C/C	G/G	C/T	1
A693	C/C	C/C	T/T	G/G	C/C	C/C	G/G	T/T	1
A695	C/C	C/A	G/T	G/G	C/C	C/A	G/G	C/C	1
A696	A/A	C/C	G/T	G/G	C/A	C/C	G/G	T/T	1
A698	C/C	C/A	G/G	G/A	C/C	C/A	G/C	C/T	1
A699	C/C	C/C	G/G	A/A	C/C	C/A	C/C	C/C	1
A700	C/A	C/C	G/T	G/A	C/A	C/A	G/C	C/T	1
A701	A/A	C/C	T/T	G/G	A/A	C/C	G/G	T/T	1
A702	C/C	C/C	G/G	A/A	C/C	C/A	C/C	C/T	1
A703	C/C	C/A	G/T	G/G	C/C	C/C	G/G	T/T	1
A705	C/C	C/A	G/G	A/A	C/C	A/A	C/C	C/C	1
A707	C/C	C/C	T/T	G/G	C/C	C/A	G/G	T/T	1
A708	C/C	C/A	G/T	G/A	C/C	C/A	G/C	C/T	1
A709	C/C	C/C	G/T	G/A	C/C	C/A	G/C	C/T	1
A710	C/A	C/C	T/T	G/G	C/A	C/A	G/G	T/T	1
A711	C/C	C/C	G/T	A/A	C/C	C/A	C/C	C/C	1
A712	C/A	C/C	T/T	G/G	C/A	C/A	G/G	T/T	1
A721	C/C	C/C	G/T	A/A	C/C	C/A	C/C	C/C	1
A722	C/C	A/A	G/T	G/G	C/C	C/C	G/G	T/T	1
A723	C/C	C/C	G/G	G/A	C/C	C/A	G/C	C/C	1
A724	C/C	C/C	T/T	G/A	C/C	C/C	G/C	C/T	1
A725	C/C	C/A	G/T	G/A	C/C	C/A	G/C	C/T	1
A726	C/C	C/C	T/T	G/G	C/C	C/A	G/G	T/T	1
A727	C/C	C/C	G/G	G/A	C/C	C/A	G/C	C/T	1
A728	C/C	C/C	T/T	G/G	C/C	C/C	G/G	T/T	1
A729	C/C	C/C	T/T	G/A	C/C	C/C	G/C	T/T	1
A730	C/C	C/C	G/T	G/A	C/C	C/A	G/C	C/T	1
A750	C/C	C/A	T/T	G/G	C/C	C/C	G/G	T/T	1
A751	C/C	C/C	G/G	A/A	C/C	A/A	C/C	C/C	1
A752	C/C	C/C	T/T	G/G	C/C	C/A	G/G	T/T	1
A754	C/C	C/C	G/T	G/A	C/C	C/C	G/C	C/T	1
A758	C/C	C/C	G/G	A/A	C/C	A/A	C/C	C/C	1
A759	C/C	C/A	G/T	G/G	C/C	C/A	G/G	T/T	1
A760	C/C	C/C	T/T	G/A	C/C	C/A	G/C	C/T	1
A761	C/A	C/C	T/T	G/A	C/A	C/C	G/C	C/T	1
A763	C/C	C/C	T/T	G/A	C/C	C/C	G/C	C/T	1
A764	C/C	C/C	T/T	G/G	C/C	C/A	G/G	T/T	1
A765	C/C	C/C	G/T	G/A	C/C	C/C	G/C	C/T	1
A769	C/C	C/A	G/G	G/A	C/C	C/C	G/C	C/T	1
A770	C/C	C/C	G/T	A/A	C/C	A/A	C/C	C/T	1
A771	C/C	C/C	G/T	G/A	C/C	C/C	G/C	C/T	1
A772	C/C	C/C	T/T	G/A	C/C	C/A	G/C	C/T	1
A773	C/C	C/C	T/T	G/G	C/C	C/C	G/G	T/T	1
A774	C/A	C/C	T/T	G/G	C/A	C/C	G/G	T/T	1
A776	C/C	C/C	G/T	G/A	C/C	C/A	G/C	C/T	1
A800	C/A	C/C	G/T	G/G	C/A	C/A	G/G	T/T	1
A801	C/C	C/C	T/T	G/G	C/C	C/C	G/G	T/T	1
A802	C/C	C/C	G/T	G/A	C/C	C/C	G/C	C/T	1
A803	C/A	C/C	G/T	G/A	C/A	C/C	G/C	C/T	1
A805	C/A	C/C	T/T	G/G	C/A	C/C	G/G	T/T	1
A806	C/C	C/C	G/T	G/A	C/C	C/C	G/C	T/T	1
A808	C/C	C/C	T/T	G/A	C/C	C/C	G/C	C/T	1
A809	C/C	C/A	G/G	A/A	C/C	A/A	C/C	C/C	1
A811	C/A	C/C	T/T	G/G	C/A	C/A	G/G	T/T	1
A812	C/C	C/C	G/T	G/A	C/C	C/A	G/C	C/T	1
A813	C/C	C/C	G/G	G/A	C/C	C/C	G/C	C/T	1
A814	C/C	C/C	T/T	G/A	C/C	C/A	G/C	C/T	1
A815	C/C	C/A	G/G	A/A	C/C	C/A	C/C	C/C	1
A816	C/C	C/C	G/T	G/G	C/C	C/C	G/G	C/T	1
A817	C/C	C/A	G/T	G/A	C/C	C/C	G/C	C/T	1
A818	C/C	C/C	G/G	G/A	C/C	C/A	G/C	C/C	1
A819	C/C	C/C	G/T	G/A	C/C	C/A	G/C	C/T	1
A820	C/C	C/A	G/T	G/A	C/C	C/C	G/C	C/T	1
A821	C/C	C/A	G/T	A/A	C/C	A/A	C/C	C/C	1
A823	C/A	C/A	G/T	G/A	C/A	A/A	G/C	T/T	1
A824	C/C	C/C	T/T	G/G	C/C	C/C	G/G	T/T	1
A825	C/C	C/A	G/T	G/A	C/C	C/C	G/C	C/T	1
A827	C/C	C/C	T/T	G/G	C/C	C/A	G/G	T/T	1
A828	C/C	C/C	G/T	G/A	C/C	C/A	G/C	C/T	1
A829	C/A	C/C	G/T	G/G	C/C	C/C	G/G	T/T	1
A830	C/A	C/C	G/T	G/A	C/A	C/C	G/C	C/T	1
A831	C/C	C/C	G/T	G/A	C/C	A/A	G/C	C/T	1
A832	C/C	C/C	G/T	G/A	C/C	C/C	G/C	C/T	1
A833	C/C	C/A	G/T	G/A	C/C	C/C	G/C	C/T	1
A834	C/C	C/C	T/T	G/A	C/C	C/A	G/C	C/T	1
A837	C/C	C/C	T/T	G/A	C/C	C/C	G/C	C/T	1
A839	C/C	C/C	G/T	G/A	C/C	C/C	G/C	C/T	1
A840	C/C	C/C	G/T	G/A	C/C	C/C	G/C	C/T	1
A841	C/C	C/C	G/T	G/A	C/C	A/A	G/C	C/T	1
A842	C/A	C/C	G/T	G/G	C/A	C/A	G/G	T/T	1
A844	C/C	C/C	T/T	G/A	C/C	C/C	G/C	T/T	1
A845	C/A	C/C	T/T	G/G	C/A	C/C	G/G	T/T	1
A846	C/A	C/C	T/T	G/G	C/A	C/C	G/G	T/T	1
A853	C/C	C/A	G/T	G/G	C/C	C/C	G/G	T/T	1
A870	C/C	C/C	G/T	G/G	C/C	C/C	G/G	T/T	1
A871	C/C	C/C	G/T	G/A	C/C	C/C	G/C	C/T	1
A901	C/C	C/C	G/T	G/A	C/C	C/A	G/C	C/T	1
A935	C/A	C/C	T/T	G/G	C/A	C/C	G/G	T/T	1
A960	C/C	C/C	G/G	G/A	C/C	C/A	G/C	C/C	1
A961	C/C	C/A	G/G	G/G	C/C	A/A	G/G	C/T	1
A964	C/C	C/C	G/T	G/A	C/C	C/A	G/C	C/T	1
A965	C/C	C/A	G/T	G/A	C/C	A/A	G/C	C/T	1
A966	C/A	C/A	G/T	G/A	C/A	C/C	G/C	C/T	1
A967	C/A	C/C	G/T	G/A	C/A	C/A	G/C	C/T	1
A968	C/A	C/C	G/T	G/A	C/A	C/C	G/C	C/T	1
A969	C/C	C/C	G/T	A/A	C/C	C/C	C/C	C/C	1
A970	C/C	C/C	T/T	G/A	C/C	C/A	G/C	T/T	1
A971	C/C	C/C	G/G	A/A	C/C	C/A	C/C	C/C	1
A972	C/C	C/C	G/G	A/A	C/C	C/C	C/C	C/C	1
A973	C/A	C/A	T/T	G/G	C/A	A/A	G/G	T/T	1
A974	C/C	C/C	G/T	G/A	C/C	A/A	G/C	C/T	1
A975	C/C	C/C	T/T	G/G	C/C	C/C	G/G	T/T	1
A976	C/A	C/A	T/T	G/G	C/A	C/C	G/G	T/T	1
A977	C/C	C/A	G/G	G/A	C/C	C/A	G/C	C/T	1
A978	C/C	C/C	T/T	G/G	C/C	C/C	G/G	T/T	1
A980	C/C	C/C	G/G	G/A	C/C	C/A	G/C	C/C	1
A981	C/A	C/C	G/T	G/A	C/A	C/C	G/C	C/T	1
A983	C/C	C/A	G/T	G/A	C/C	C/C	G/C	C/T	1
A984	C/A	C/C	T/T	G/A	C/A	C/C	G/C	C/T	1
A985	C/C	C/C	G/T	G/A	C/C	C/A	G/C	C/T	1
A988	C/C	C/A	G/T	G/A	C/C	C/C	G/C	C/T	1
C301	C/C	C/A	T/T	G/G	C/C	C/A	G/G	T/T	0
C302	C/C	C/A	T/T	G/G	C/C	C/C	G/G	T/T	0
C303	C/C	C/A	G/T	A/A	C/C	C/A	C/C	C/C	0
C304	C/C	C/C	G/G	G/A	C/C	C/C	G/C	C/C	0
C305	C/C	C/A	G/G	A/A	C/C	C/C	C/C	C/C	0
C306	C/C	C/C	G/T	G/A	C/C	C/A	G/C	C/T	0
C307	C/C	C/A	G/G	A/A	C/C	C/A	C/C	C/C	0
C308	C/C	C/C	G/T	G/A	C/C	C/A	G/C	C/T	0
C309	C/C	C/C	G/T	A/A	C/C	A/A	C/C	C/T	0
C310	C/C	C/C	T/T	G/A	C/C	C/C	G/C	C/T	0
C311	C/C	C/A	G/T	A/A	C/C	C/A	C/C	C/C	0
C312	C/C	A/A	T/T	G/A	C/C	C/A	G/C	C/T	0
C313	C/C	C/C	T/T	G/G	C/C	C/C	G/G	T/T	0
C314	C/C	C/C	G/T	G/A	C/C	C/A	G/C	C/T	0
C315	C/C	C/A	G/T	G/A	C/C	C/A	G/C	C/T	0
C316	C/A	A/A	G/T	G/A	C/A	C/C	G/C	C/T	0
C317	C/A	C/A	T/T	G/G	C/A	C/C	G/G	T/T	0
C318	C/C	C/C	G/T	A/A	C/C	C/A	C/C	C/T	0
C319	C/C	C/C	G/T	G/A	C/C	C/C	G/C	C/T	0
C320	C/C	C/C	G/T	A/A	C/C	C/C	C/C	C/C	0
C321	C/C	C/C	G/T	G/A	C/C	C/C	G/C	C/T	0
C322	C/C	C/C	G/T	G/G	C/C	C/C	G/G	T/T	0
C324	C/C	C/A	G/T	G/A	C/C	A/A	G/C	C/C	0
C325	C/C	C/C	T/T	G/G	C/C	C/C	G/G	T/T	0
C326	C/C	C/C	G/G	A/A	C/C	C/C	C/C	C/C	0
C327	C/C	C/A	T/T	G/G	C/C	C/C	G/G	T/T	0
C328	C/C	C/A	T/T	G/G	C/C	C/C	G/G	T/T	0
C330	C/A	C/C	T/T	G/A	C/A	C/C	G/C	C/T	0
C331	C/A	C/C	G/T	G/G	C/A	C/C	G/G	T/T	0
C332	C/C	C/C	G/T	G/G	C/C	C/C	G/G	C/T	0
C333	C/C	C/C	G/G	G/A	C/C	C/C	G/C	C/T	0
C335	C/C	C/C	G/G	G/A	C/C	A/A	G/C	C/T	0
C336	C/C	C/C	T/T	G/A	C/C	C/A	G/C	T/T	0
C337	C/C	C/C	G/T	G/A	C/C	C/A	G/C	C/T	0
C338	C/A	C/C	T/T	G/G	C/A	C/C	G/G	T/T	0
C339	C/C	C/C	G/T	G/A	C/C	C/A	G/C	C/T	0
C340	C/C	C/C	G/T	G/A	C/C	C/C	G/C	C/T	0
C341	C/C	C/C	G/T	G/G	C/C	C/C	G/G	C/T	0
C342	C/C	C/C	T/T	G/G	C/C	C/A	G/G	T/T	0
C343	C/C	C/C	G/T	G/G	C/C	C/C	G/G	C/T	0
C344	C/C	C/C	G/G	A/A	C/C	C/A	C/C	C/C	0
C345	C/C	C/C	G/T	A/A	C/C	C/C	C/C	C/C	0
C347	C/C	C/A	T/T	G/G	C/C	C/C	G/G	T/T	0
C348	C/C	C/C	G/T	G/G	C/C	C/C	G/G	T/T	0
C349	C/A	C/C	G/G	G/A	C/A	A/A	G/C	C/T	0
C350	C/C	C/C	G/T	A/A	C/C	C/C	C/C	C/C	0
C351	C/C	C/C	T/T	G/G	C/C	C/A	G/G	T/T	0
C352	C/C	C/A	G/G	A/A	C/C	C/A	C/C	C/C	0
C353	C/C	C/C	T/T	G/G	C/C	C/A	G/G	C/T	0
C354	C/C	C/C	G/G	A/A	C/C	C/A	C/C	C/C	0
C355	C/A	C/A	G/T	G/A	C/A	A/A	G/C	C/T	0
C356	C/C	C/A	G/G	A/A	C/C	C/C	C/C	C/C	0
C357	C/A	C/C	T/T	G/A	C/A	C/C	G/C	C/T	0
C358	C/C	C/C	G/T	G/A	C/C	C/A	G/C	C/T	0
C359	C/C	C/C	T/T	G/G	C/C	C/C	G/G	T/T	0
C360	C/C	C/C	T/T	G/G	C/C	C/C	G/C	T/T	0
C361	C/C	C/C	T/T	G/A	C/C	C/A	G/C	C/T	0
C362	C/C	C/A	G/G	A/A	C/C	C/C	C/C	C/C	0
C363	C/C	C/C	G/G	A/A	C/C	C/A	C/C	C/C	0
C364	C/C	C/C	G/G	G/A	C/C	C/A	G/C	C/C	0
C365	C/C	C/A	G/T	G/A	C/C	C/A	G/C	C/T	0
C366	C/C	C/C	T/T	G/A	C/C	C/A	G/C	C/T	0
C367	C/C	C/C	G/T	G/A	C/C	C/A	G/C	C/T	0
C368	C/C	A/A	G/T	G/A	C/C	C/C	G/C	C/T	0
C369	C/C	C/C	G/T	G/A	C/C	C/C	G/C	C/T	0
C370	C/C	C/C	G/T	G/A	C/C	C/A	G/C	C/T	0
C371	C/C	C/A	G/G	G/A	C/C	C/A	G/C	C/C	0
C372	C/C	C/A	T/T	G/A	C/C	C/C	G/C	C/T	0
C373	C/C	C/C	T/T	G/G	C/C	C/A	G/G	T/T	0
C374	C/C	C/C	T/T	G/G	C/C	C/C	G/G	T/T	0
C375	C/C	C/C	G/T	G/A	C/C	C/A	G/C	C/T	0
C376	C/A	C/C	G/T	G/A	C/A	A/A	G/C	C/T	0
C377	C/C	C/A	G/T	G/G	C/C	C/C	G/G	T/T	0
C380	C/C	C/C	T/T	G/G	C/C	C/C	G/G	T/T	0
C381	C/C	C/C	T/T	G/G	C/C	C/A	G/G	T/T	0
C385	C/C	C/C	G/G	G/A	C/C	C/A	G/C	C/C	0
C386	C/A	C/C	T/T	G/G	C/A	C/A	G/G	T/T	0
C387	C/C	C/C	G/T	A/A	C/C	A/A	C/C	C/C	0
C388	C/C	C/A	G/G	A/A	C/C	C/A	C/C	C/C	0
C389	C/C	C/C	T/T	G/G	C/C	C/A	G/G	T/T	0
C390	C/C	C/C	G/T	G/A	C/C	C/A	G/C	C/T	0
C391	C/C	C/C	T/T	G/G	C/C	C/C	G/G	T/T	0
C392	C/A	C/A	T/T	G/G	C/A	C/A	G/G	T/T	0
C393	C/C	C/C	G/T	G/A	C/C	C/A	G/C	C/T	0
C394	C/A	C/C	G/T	G/A	C/A	A/A	G/C	C/T	0
C395	C/C	C/A	G/G	A/A	C/C	C/A	C/C	C/C	0
C396	C/C	C/C	G/T	G/A	C/C	C/C	G/C	C/T	0
C399	C/C	C/C	G/T	G/A	C/C	C/A	G/C	C/T	0
C400	C/C	C/C	G/G	A/A	C/C	C/C	C/C	C/C	0
C401	C/A	C/C	G/T	G/A	C/A	A/A	G/C	C/T	0
C402	C/C	C/A	T/T	G/G	C/C	C/C	G/G	T/T	0
C403	C/C	C/C	G/T	G/A	C/C	C/C	G/C	C/T	0
C404	C/C	C/C	G/T	G/A	C/C	C/A	G/C	C/T	0
C405	C/C	C/C	G/T	G/A	C/C	C/C	G/C	C/T	0
C406	C/C	C/A	T/T	G/G	C/C	C/C	G/G	T/T	0
C407	C/C	C/A	G/G	G/A	C/C	A/A	G/C	C/C	0
C408	C/C	C/C	G/T	G/A	C/C	C/A	G/C	C/T	0
C409	C/A	C/C	T/T	G/G	C/A	C/C	G/G	T/T	0
C410	C/C	C/C	G/T	G/A	C/C	A/A	G/C	C/T	0
C411	C/C	C/C	G/G	G/A	C/C	C/A	G/C	C/T	0
C412	C/A	C/A	T/T	G/G	C/A	C/A	G/G	T/T	0
C413	C/C	C/C	T/T	G/G	C/C	C/A	G/G	T/T	0
C414	C/A	C/C	G/T	G/A	C/A	C/A	G/C	C/T	0
C415	C/A	C/C	T/T	G/G	C/A	C/C	G/G	T/T	0
C416	C/C	C/C	G/T	G/A	C/C	C/A	G/C	C/T	0
C418	C/C	C/A	G/T	G/G	C/C	C/C	G/G	C/T	0
C419	C/C	C/A	T/T	G/G	C/C	C/C	G/G	T/T	0
C420	C/A	C/A	G/T	G/G	C/A	C/A	G/G	C/T	0
C421	C/C	C/C	G/T	G/A	C/C	C/C	G/C	C/T	0
C422	C/C	C/A	G/T	G/A	C/C	C/C	G/C	C/T	0
C424	C/A	C/C	G/T	G/A	C/A	A/A	G/C	C/T	0
C427	C/C	C/C	G/T	G/A	C/C	C/A	G/C	C/C	0
C428	C/C	C/A	G/T	G/A	C/C	A/A	G/C	C/T	0
C429	C/C	C/C	T/T	G/A	C/C	C/A	G/C	C/T	0
C430	C/C	C/C	T/T	G/A	C/C	C/C	G/C	C/T	0
C432	C/C	C/C	G/G	A/A	C/C	C/A	C/C	C/C	0
C433	A/A	C/C	T/T	G/G	A/A	C/A	G/G	T/T	0
C434	C/C	C/C	T/T	G/A	C/C	C/A	G/C	T/T	0
C435	C/C	C/C	G/G	A/A	C/C	C/A	G/C	C/C	0
C436	C/C	C/C	T/T	G/G	C/C	C/A	G/G	T/T	0
C437	C/C	C/C	T/T	G/A	C/C	C/A	G/C	T/T	0
C439	C/C	C/C	G/T	G/A	C/C	C/A	G/C	C/T	0
C440	C/C	C/C	G/T	G/A	C/C	C/C	G/C	C/T	0
C441	C/C	C/C	G/T	G/A	C/C	C/C	G/C	C/T	0
C443	C/C	C/C	T/T	G/G	C/C	C/A	G/G	T/T	0
C444	C/C	C/C	G/T	A/A	C/C	C/C	G/C	C/C	0
C445	C/C	C/C	G/T	G/A	C/C	C/A	G/C	C/T	0
C446	C/C	C/C	G/T	G/A	C/C	C/C	G/C	C/T	0
C448	C/A	C/C	G/T	G/A	C/A	C/C	G/C	C/T	0
C449	C/C	C/C	G/T	G/G	C/C	C/C	G/G	C/T	0
C450	A/A	C/C	T/T	G/G	A/A	C/C	G/G	T/T	0
C451	C/C	C/C	T/T	G/A	C/C	C/A	G/C	C/T	0
C452	C/C	C/C	T/T	G/G	C/C	C/C	G/G	T/T	0
C453	C/C	C/C	T/T	G/A	C/C	C/C	G/C	T/T	0
C454	C/C	C/C	G/G	G/A	C/C	C/A	G/C	C/C	0
C456	C/C	C/C	T/T	G/G	C/C	C/C	G/G	T/T	0
C457	C/C	C/C	G/T	G/A	C/C	C/C	G/C	C/T	0
C458	C/C	C/C	G/T	G/A	C/C	C/A	G/C	C/C	0
C459	C/C	C/C	G/G	A/A	C/C	C/A	C/C	C/C	0
C460	C/C	C/C	T/T	G/G	C/C	C/C	G/G	T/T	0
C461	C/C	C/C	G/G	A/A	C/C	C/A	C/C	C/C	0
C462	C/C	C/C	G/G	A/A	C/C	C/A	C/C	C/C	0
C463	C/C	C/C	G/T	G/G	C/C	C/C	G/G	C/T	0
C465	C/C	C/C	G/T	G/G	C/C	C/A	G/G	T/T	0
C466	C/C	C/C	T/T	G/G	C/C	C/C	G/G	T/T	0
C467	C/C	C/C	G/T	G/A	C/C	C/A	G/C	T/T	0
C469	C/C	C/C	G/G	A/A	C/C	C/A	G/C	C/C	0
C470	C/C	C/C	G/T	G/A	C/C	C/A	G/C	C/T	0
C471	C/C	C/C	G/T	G/A	C/C	C/C	G/C	C/T	0
C472	C/A	C/C	G/T	G/G	C/A	C/C	G/G	T/T	0
C474	C/C	C/A	G/T	G/A	C/C	C/A	G/C	C/T	0
C475	C/C	C/C	G/G	G/A	C/C	C/A	G/C	C/C	0
C476	C/A	C/C	G/T	G/G	C/A	C/A	G/G	T/T	0
C477	C/A	C/C	G/G	G/A	C/A	C/A	G/C	C/T	0
C478	C/C	C/C	G/G	G/A	C/C	C/C	G/C	C/C	0
C479	C/C	C/A	G/T	G/G	C/C	C/A	G/G	C/T	0
C480	C/C	C/C	G/T	G/G	C/C	C/C	G/G	C/T	0
C481	C/C	C/C	T/T	A/A	C/C	C/C	C/C	C/C	0
C482	C/C	C/C	T/T	G/A	C/C	C/C	G/C	C/T	0
C483	C/C	C/C	G/T	G/A	C/C	C/A	G/C	C/T	0
C485	C/A	C/C	G/T	G/A	C/A	C/C	G/C	C/T	0
C486	C/C	C/C	T/T	G/G	C/C	C/C	G/G	T/T	0
C488	C/C	C/C	T/T	G/G	C/C	C/A	G/G	T/T	0
C489	C/C	C/C	G/T	G/A	C/C	C/A	G/C	C/T	0
C490	C/C	C/C	G/T	A/A	C/C	C/C	C/C	C/C	0
C492	C/A	C/C	T/T	G/G	C/A	C/C	G/G	T/T	0
C493	C/C	C/C	G/G	G/A	C/C	C/C	G/C	C/T	0
C494	C/C	C/C	T/T	G/G	C/C	C/A	G/G	T/T	0
C495	C/A	C/C	G/T	G/A	C/A	A/A	G/C	C/T	0
C496	C/C	C/C	G/G	A/A	C/C	C/A	C/C	C/C	0
C497	C/A	C/C	T/T	G/G	C/A	C/A	G/G	T/T	0
C498	C/A	C/A	T/T	G/G	C/A	A/A	G/G	T/T	0
C499	C/C	C/A	G/T	G/A	C/C	C/A	G/C	C/T	0
C500	C/C	C/C	G/G	A/A	C/C	C/A	C/C	C/C	0
C501	C/C	C/C	T/T	G/G	C/C	C/C	G/G	T/T	0
C503	C/A	C/C	T/T	G/G	C/A	C/A	G/G	T/T	0
C504	C/C	C/C	T/T	G/G	C/C	C/C	G/G	T/T	0
C505	C/C	C/C	G/T	A/A	C/C	C/C	C/C	C/C	0
C507	C/C	C/C	G/T	G/G	C/C	C/C	G/G	C/T	0
C508	C/A	A/A	T/T	G/G	C/A	C/C	G/G	T/T	0
C509	C/C	C/A	G/T	G/G	C/C	C/C	G/G	C/T	0
C511	C/C	C/C	T/T	G/A	C/C	C/C	G/C	C/T	0
C513	C/A	A/A	G/T	G/A	C/A	C/C	G/C	C/T	0
C514	C/C	C/C	G/T	G/A	C/C	C/A	G/C	C/T	0
C516	C/C	C/A	G/T	G/G	C/C	C/C	G/G	T/T	0
C517	C/A	C/A	T/T	G/A	C/A	C/C	G/C	T/T	0
C518	C/C	C/C	T/T	G/A	C/C	C/C	G/C	C/T	0
C519	C/C	C/A	G/T	G/A	C/C	C/C	G/C	C/T	0
C520	C/C	C/A	G/G	G/A	C/C	C/C	G/C	C/T	0
C523	C/C	C/A	G/T	G/G	C/C	C/C	G/G	T/T	0
C525	C/C	C/C	G/T	G/A	C/C	C/A	G/C	C/T	0
C526	C/C	C/C	T/T	G/G	C/C	C/C	G/G	T/T	0
C528	C/C	C/A	G/G	G/G	C/C	C/C	G/G	T/T	0
C529	C/C	C/C	G/G	G/A	C/C	C/A	G/C	C/C	0
C531	C/A	C/C	G/T	G/A	C/A	C/C	G/C	C/T	0
C532	C/C	C/C	G/T	G/A	C/C	C/C	G/G	C/C	0
C533	C/C	C/A	T/T	G/G	C/C	C/C	G/G	T/T	0
C534	C/A	C/C	T/T	G/G	C/A	C/C	G/G	T/T	0
C536	C/C	C/C	G/G	A/A	C/C	C/A	C/C	C/C	0
C538	C/C	C/A	G/G	A/A	C/C	C/A	C/C	C/C	0
C539	C/C	C/A	G/T	G/A	C/C	C/C	G/C	C/T	0
C540	C/C	C/C	G/T	G/A	C/C	C/A	G/C	C/T	0
C542	C/C	C/C	G/T	G/A	C/C	C/C	G/C	C/T	0
C549	C/C	C/C	G/T	G/A	C/C	C/C	G/C	C/T	0
C550	A/A	C/C	T/T	G/G	A/A	C/A	G/G	T/T	0
C554	C/C	C/C	G/T	G/G	C/C	C/A	G/G	T/T	0
C556	C/C	C/C	G/G	A/A	C/C	C/A	G/C	C/C	0
C557	C/C	C/C	G/T	G/G	C/C	C/A	G/G	C/T	0
C559	C/C	C/A	G/G	G/A	C/C	C/C	G/C	C/T	0
C561	C/A	C/C	G/T	G/A	C/A	C/A	G/C	C/T	0
C562	C/C	C/C	G/T	G/A	C/C	C/A	G/C	C/T	0
C564	C/C	C/C	G/G	A/A	C/C	C/A	C/C	C/C	0
C565	C/C	C/C	T/T	G/G	C/C	C/C	G/G	T/T	0
C566	C/C	A/A	T/T	G/G	C/C	C/C	G/G	T/T	0
C567	C/C	C/A	T/T	G/A	C/C	C/C	G/C	C/T	0
C569	C/C	C/C	T/T	G/G	C/C	C/A	G/G	C/T	0
C571	C/C	C/C	G/G	A/A	C/C	C/A	C/C	C/C	0
C572	C/C	C/C	T/T	G/A	C/C	C/C	G/C	C/T	0
C573	C/C	C/C	G/T	G/A	C/C	C/C	G/C	C/T	0
C574	C/C	C/C	T/T	G/G	C/C	C/C	G/G	T/T	0
C575	C/C	C/A	G/T	G/A	C/C	C/C	G/C	C/T	0
C576	C/C	C/C	T/T	G/G	C/C	C/C	G/G	T/T	0
C577	C/C	C/C	T/T	G/A	C/C	C/C	G/C	C/T	0
C578	C/C	C/A	T/T	G/G	C/C	C/C	G/G	T/T	0
C579	C/C	C/C	G/T	G/A	C/C	C/A	G/C	C/T	0
C580	C/C	C/C	G/T	G/A	C/C	C/A	G/C	C/T	0
C581	C/A	C/C	T/T	G/A	C/A	C/C	G/C	C/T	0
C582	C/C	C/A	G/G	G/A	C/C	A/A	G/C	C/T	0
C584	C/A	C/C	T/T	G/A	C/A	C/A	G/C	T/T	0
C585	C/A	C/C	T/T	G/G	C/A	C/A	G/G	T/T	0
C587	C/C	C/A	G/T	G/A	C/C	C/A	G/C	C/T	0
C589	C/C	C/A	G/T	G/A	C/C	C/A	G/C	C/T	0
C590	C/A	C/A	G/G	G/A	C/A	C/A	G/C	C/T	0
C592	C/C	C/C	G/G	G/A	C/C	A/A	G/C	C/T	0
C593	C/C	C/A	G/T	G/G	C/C	C/C	G/G	T/T	0
C594	C/C	C/C	G/T	A/A	C/C	C/C	C/C	C/C	0
C596	C/C	C/C	T/T	G/G	C/C	C/A	G/G	T/T	0
C597	C/C	C/C	G/T	G/G	C/C	C/C	G/G	C/T	0
C599	C/C	C/C	T/T	G/G	C/C	C/A	G/G	T/T	0
C600	C/C	C/C	G/T	G/G	C/C	A/A	G/G	C/T	0
C601	C/C	C/C	T/T	G/G	C/C	C/C	G/G	T/T	0
C602	C/A	C/C	G/T	G/A	C/A	A/A	G/C	C/T	0
C603	C/C	C/C	G/T	G/A	C/C	A/A	G/C	C/T	0
C604	C/C	C/A	G/G	G/A	C/C	A/A	G/C	C/T	0
C605	C/C	C/C	G/T	G/A	C/C	C/A	G/C	C/T	0
C606	C/C	C/A	G/G	A/A	C/C	C/A	C/C	C/C	0
C607	C/C	C/A	T/T	G/G	C/C	C/C	G/G	T/T	0
C608	C/C	C/C	G/T	G/A	C/C	C/A	G/C	C/T	0
C609	C/C	C/C	T/T	G/A	C/C	C/A	G/C	C/T	0
C610	C/A	C/A	G/T	G/G	C/A	C/A	G/G	C/T	0
C611	C/C	C/A	G/G	A/A	C/C	C/C	C/C	C/C	0
C612	C/C	C/A	G/G	A/A	C/C	C/C	C/C	C/C	0
C613	C/C	C/A	G/T	G/A	C/C	C/A	G/C	C/T	0
C614	C/C	C/C	T/T	G/G	C/C	C/C	G/G	T/T	0
C616	C/A	C/C	G/T	G/A	C/A	C/A	G/C	C/T	0
C617	C/C	C/C	G/T	G/G	C/C	C/A	G/G	T/T	0
C618	C/C	C/C	T/T	G/G	C/C	C/C	G/G	T/T	0
C619	C/C	C/A	G/G	A/A	C/C	C/A	C/C	C/C	0
C629	C/A	C/C	G/T	G/A	C/A	C/A	G/C	C/T	0
C632	C/A	C/C	T/T	G/A	C/A	C/C	G/C	T/T	0
C634	C/C	C/C	G/T	G/A	C/C	A/A	G/C	C/T	0
C635	C/A	C/C	T/T	G/A	C/A	C/A	G/C	C/T	0
C639	C/C	C/A	G/T	G/A	C/C	C/A	G/C	C/T	0
C642	C/C	C/A	G/T	G/A	C/C	C/A	G/C	C/T	0
C643	C/C	C/A	G/T	G/A	C/C	C/C	G/C	C/T	0
C646	C/C	C/A	T/T	G/A	C/C	C/C	G/C	C/T	0
C648	C/C	C/C	T/T	G/A	C/C	C/C	G/C	T/T	0
C649	C/C	C/C	T/T	G/A	C/C	C/A	G/C	C/T	0
C651	C/C	C/C	G/G	G/A	C/C	C/C	G/C	C/C	0
C652	C/C	C/A	T/T	G/G	C/C	C/A	G/G	T/T	0
C653	C/C	C/C	G/T	G/A	C/C	C/A	G/C	C/T	0
C656	C/C	C/A	G/T	G/A	C/C	C/A	G/C	C/T	0
C659	C/C	C/C	G/G	A/A	C/C	C/C	C/C	C/C	0
C660	C/C	C/A	T/T	G/A	C/C	C/C	C/C	T/T	0
C662	C/A	C/C	G/T	G/A	C/A	C/A	G/C	C/T	0
C664	C/C	C/C	G/T	G/G	C/C	C/C	G/G	T/T	0
C666	C/C	C/A	G/T	G/A	C/C	C/C	G/C	C/T	0
C667	C/A	C/A	T/T	G/G	C/A	C/C	G/G	T/T	0
C669	C/A	C/C	G/T	G/A	C/A	C/A	G/C	C/T	0
C670	C/C	C/C	G/T	G/G	C/C	C/C	G/G	C/T	0
C671	C/C	C/C	T/T	G/G	C/C	C/A	G/G	T/T	0
C673	C/C	C/C	G/T	G/G	C/C	C/C	G/G	C/T	0
C674	C/C	C/A	G/T	G/A	C/C	C/C	G/C	C/T	0
C678	C/C	C/A	G/T	G/A	C/C	C/A	G/C	C/T	0
C679	C/A	A/A	G/T	G/G	C/A	C/A	G/G	T/T	0
C681	C/A	C/C	T/T	G/G	C/A	C/C	G/G	T/T	0
C682	C/C	C/C	T/T	G/G	C/C	C/C	G/G	C/T	0
C683	C/C	C/C	G/G	A/A	C/C	C/A	C/C	C/C	0
C685	C/A	C/C	G/T	G/G	C/A	C/C	G/G	T/T	0
C686	C/C	C/C	G/T	G/G	C/C	C/C	G/G	T/T	0
C687	C/C	C/A	T/T	G/A	C/C	C/A	G/C	T/T	0
C688	C/C	C/C	G/T	A/A	C/C	A/A	C/C	C/C	0
C690	C/C	C/A	T/T	G/A	C/C	C/A	G/C	C/T	0
C691	C/C	C/C	T/T	G/A	C/C	C/A	G/C	T/T	0
C692	C/C	C/C	G/T	G/A	C/C	C/A	G/C	C/T	0
C693	C/C	C/C	G/T	G/A	C/C	C/A	G/C	C/T	0
C696	C/C	C/C	T/T	G/A	C/C	C/C	G/C	C/T	0
C697	C/C	C/C	G/T	G/G	C/C	C/A	G/G	C/T	0
C698	C/C	C/C	G/T	G/A	C/C	C/C	G/C	C/T	0
C701	C/C	A/A	G/T	G/A	C/C	C/A	G/C	C/T	0
C702	C/C	C/C	G/G	A/A	C/C	C/A	C/C	C/C	0
C704	C/C	C/C	G/T	G/G	C/C	C/C	G/G	C/T	0
C705	C/C	C/C	T/T	G/G	C/C	C/A	G/G	T/T	0
C706	C/A	C/C	G/T	G/A	C/A	C/A	G/C	C/T	0
C707	C/A	C/C	T/T	G/G	C/A	C/A	G/G	T/T	0
C708	C/C	C/A	G/G	G/A	C/C	C/C	G/C	C/T	0
C709	C/C	C/C	G/T	G/A	C/C	C/A	G/C	C/T	0
C710	C/C	C/A	T/T	G/G	C/C	C/C	G/G	T/T	0
C711	C/C	C/A	G/T	G/A	C/C	C/C	G/G	C/T	0
C712	C/C	C/C	G/G	G/A	C/C	C/A	G/C	C/T	0
C714	C/C	C/C	G/G	G/A	C/C	C/C	G/C	C/T	0
C715	C/A	C/A	T/T	G/A	C/A	C/C	G/C	T/T	0
C716	C/C	C/C	T/T	A/A	C/C	C/C	C/C	T/T	0
C717	C/C	C/C	G/T	G/A	C/C	C/C	G/C	C/T	0
C718	C/C	C/C	G/G	A/A	C/C	C/C	C/C	C/C	0
C720	C/C	C/C	G/T	A/A	C/C	C/C	C/C	C/C	0
C721	C/A	C/C	T/T	G/G	C/A	C/C	G/G	T/T	0
C724	C/C	C/C	G/T	G/A	C/C	C/A	G/C	C/T	0
C725	C/A	C/C	T/T	G/G	C/A	C/A	G/G	T/T	0
C726	C/A	C/C	T/T	G/G	C/A	C/C	G/G	T/T	0
C727	C/C	C/A	G/G	A/A	C/C	A/A	C/C	C/C	0
C728	C/C	C/A	G/G	G/A	C/C	C/C	G/C	C/T	0
C729	C/C	C/C	G/G	A/A	C/C	C/A	C/C	C/C	0
C730	C/C	C/A	G/T	G/A	C/C	C/A	G/C	C/T	0
C734	C/C	C/C	G/T	G/A	C/C	C/A	G/C	C/T	0
C735	C/C	C/A	G/T	G/G	C/C	C/C	G/G	C/C	0
C736	C/C	C/C	G/G	G/A	C/C	C/A	G/C	C/C	0
C737	C/C	C/C	G/T	G/A	C/C	C/C	G/C	C/T	0
C738	C/C	C/C	G/G	A/A	C/C	A/A	C/C	C/C	0
C739	C/C	C/C	G/G	A/A	C/C	C/A	C/C	C/C	0
C740	C/C	C/C	T/T	G/G	C/C	C/C	G/G	T/T	0
C741	C/C	C/C	T/T	G/A	C/C	C/C	G/G	C/T	0
C743	C/A	C/C	T/T	G/G	C/A	C/A	G/G	T/T	0
C744	C/A	C/C	G/T	G/A	C/A	C/C	G/C	C/T	0
C745	C/C	C/C	G/T	A/A	C/C	C/A	C/C	C/C	0
C746	C/C	C/C	G/T	G/G	C/C	C/C	G/G	T/T	0
C747	C/C	C/C	G/G	A/A	C/C	C/A	C/C	C/C	0
C748	C/C	C/C	G/G	A/A	C/C	C/C	C/C	C/C	0
C749	C/C	C/A	G/T	A/A	C/C	C/C	C/C	C/C	0
C750	C/A	C/A	T/T	G/G	C/A	C/A	G/G	T/T	0
C752	C/C	C/C	G/T	G/A	C/C	C/C	G/C	C/T	0
C753	C/C	C/C	G/T	G/A	C/C	C/C	G/C	C/T	0
C755	C/C	C/A	G/G	A/A	C/C	C/C	C/C	C/C	0
C756	C/C	C/A	G/T	G/A	C/C	C/A	G/C	C/T	0
C759	C/A	C/C	T/T	G/G	C/A	C/C	G/G	T/T	0
C760	C/C	C/C	G/T	G/A	C/C	C/C	G/C	C/T	0
C761	C/C	C/C	G/G	A/A	C/C	C/A	C/C	C/C	0
C764	C/C	C/A	G/T	G/A	C/C	C/A	G/C	C/T	0
C765	C/C	C/A	G/T	G/A	C/C	C/A	G/C	C/T	0
C766	C/C	C/C	T/T	G/G	C/C	C/C	G/G	T/T	0
C767	C/A	A/A	G/T	G/G	C/A	C/C	G/G	T/T	0
C768	C/A	C/C	G/T	G/A	C/A	C/C	G/C	C/T	0
C769	C/C	C/C	G/G	A/A	C/C	C/A	C/C	C/C	0
C770	C/C	C/C	G/T	G/A	C/C	C/C	G/C	T/T	0
C771	C/C	C/C	G/T	G/A	C/C	C/A	G/G	C/C	0
C772	C/C	C/C	G/T	G/G	C/C	C/C	G/G	C/T	0
C773	C/C	C/C	G/G	A/A	C/C	C/A	C/C	C/C	0
C774	C/C	C/C	T/T	G/G	C/C	C/C	G/G	T/T	0
C775	C/C	C/A	T/T	G/G	C/C	C/C	G/G	T/T	0
C776	C/C	C/C	T/T	G/A	C/C	C/C	G/G	C/T	0
C778	C/C	C/C	G/G	A/A	C/C	C/C	G/C	C/C	0
C779	C/C	C/C	G/G	A/A	C/C	A/A	C/C	C/C	0
C780	C/C	C/C	T/T	G/A	C/C	C/C	G/C	C/T	0
C781	C/A	C/C	G/T	G/G	C/A	C/A	G/G	T/T	0
C782	C/C	C/C	G/T	G/A	C/C	C/C	G/C	C/T	0
C783	C/C	C/A	G/G	A/A	C/C	C/A	C/C	C/C	0
C785	C/C	C/C	G/T	A/A	C/C	C/C	C/C	C/C	0
C786	C/C	C/C	G/T	G/A	C/C	C/A	G/C	C/T	0
C788	C/C	C/A	G/G	G/A	C/C	C/C	G/C	C/C	0
C789	C/C	C/C	G/G	A/A	C/C	C/A	C/C	C/C	0
C790	C/C	C/C	G/G	G/A	C/C	C/A	G/C	C/C	0
C791	C/C	C/A	G/T	G/A	C/C	C/C	G/C	C/T	0
C792	C/C	C/C	G/T	G/A	C/C	C/C	G/C	C/T	0
C793	C/C	C/A	T/T	G/G	C/C	C/C	G/G	T/T	0
C794	C/C	C/C	G/T	G/G	C/C	C/A	G/G	C/T	0
C795	C/C	C/C	G/T	G/A	C/C	C/A	G/C	C/T	0
C796	C/A	C/C	G/T	G/G	C/A	C/A	G/G	T/T	0
C797	C/C	C/C	G/G	G/A	C/C	C/C	G/C	C/C	0
C798	C/C	C/A	G/T	G/A	C/C	C/A	G/C	C/T	0
C800	C/C	C/C	T/T	G/A	C/C	C/C	G/C	C/T	0
C801	C/C	C/C	G/T	G/A	C/C	C/C	G/C	C/T	0
C802	C/C	C/C	G/T	A/A	C/C	C/C	C/C	C/C	0
C803	C/C	C/A	G/T	G/A	C/C	C/A	G/C	C/T	0
C804	C/C	C/A	G/T	G/G	C/C	C/C	G/G	T/T	0
C805	C/C	C/A	G/G	A/A	C/C	A/A	C/C	C/C	0
C806	C/C	C/C	T/T	G/A	C/C	C/C	G/C	C/T	0
C807	C/C	C/C	G/T	A/A	C/C	C/A	G/C	C/C	0
C808	C/C	C/C	T/T	G/G	C/C	C/A	G/G	T/T	0
C809	C/C	C/C	G/T	A/A	C/C	C/C	C/C	C/C	0
C810	C/C	C/C	T/T	G/G	C/C	C/C	G/C	T/T	0
C811	C/C	C/A	G/T	G/G	C/C	C/C	G/G	C/C	0
C812	C/C	C/C	G/T	G/G	C/C	C/C	G/G	C/T	0
C813	C/A	C/C	G/T	G/A	C/C	C/C	G/C	C/T	0
C814	C/A	C/C	G/G	G/A	C/A	C/C	G/C	C/T	0
C815	C/C	C/A	G/T	A/A	C/C	C/A	C/C	C/T	0

## Sheet: SNP Information
SNP	Chr	Chr. Position	Alleles	Gene	Ref mRNA	SNP Property	Functional Change	PCR_Primers	Length	A1	A2	P1	F1	L1	P2	F2	L2	Pc	Lc	A1_Size	A2_Size	POS.
rs6556416	5	158818745	A/C	IL12B	NM_002187.2	5'-flanking	/	rs6556416F/R	129	C	A	rs6556416RC	FAM	41	rs6556416RA	VIC	42	rs6556416RP	29	91	92	88.95	90.84
rs10045431	5	158814533	A/C	IL12B	NM_002187.2	5'-flanking	/	rs10045431F/R	207	C	A	rs10045431FC	NED	42	rs10045431FA	PET	40	rs10045431FP	30	93	91	89.36	92.63
rs6871626	5	158826792	A/C	IL12B	NM_002187.2	5'-flanking	/	rs6871626F/R	297	C	A	rs6871626FC	FAM	40	rs6871626FA	VIC	41	rs6871626FP	33	94	95	90.96	94.81
rs7709212	5	158764177	C/T	IL12B	NM_002187.2	5'-flanking	/	rs7709212F/R	107	C	T	rs7709212FC	FAM	44	rs7709212FT	VIC	45	rs7709212FP	35	100	101	99.09	101.27
rs11167764	5	141479065	A/C	IL12B	NM_002187.2	3'-flanking	/	rs11167764F/R	366	C	A	rs11167764RC	FAM	46	rs11167764RA	VIC	47	rs11167764RP	42	109	110	106.6	107.99
rs6556412	5	158787385	A/G	IL12B	NM_002187.2	5'-flanking	/	rs6556412F/R	395	G	A	rs6556412RG	NED	55	rs6556412RA	PET	53	rs6556412RP	35	111	109	110.02	112.7
rs6887695	5	158822645	C/G	IL12B	NM_002187.2	5'-flanking	/	rs6887695F/R	286	G	C	rs6887695FG	FAM	52	rs6887695FC	VIC	53	rs6887695FP	39	112	113	110.87	112.83
rs3212227	5	158742950	G/T	IL12B	NM_002187.2	3'-utr_exon8	/	rs3212227F/R	254	G	T	rs3212227RG	NED	58	rs3212227RT	PET	56	rs3212227RP	35	114	112	111.85	114.35
注1:Ref.=Reference;Ext.=Extension;POS.=Position;A1=Allele 1;A2=Allele 2;P1=特异性连接引物1;P2=特异性连接引物2;Pc=通用连接引物
注2：FAM荧光基团显蓝色；VIC荧光基团显绿色；NED荧光基团显黄色；PET荧光基团显红色
注3：某些基因的mRNA有多种剪切方式，表格中Property是相对Ref.mRNA而言的。
注4：通用连接引物Pc的FP，RP分别指代正向或反向连接引物

## Sheet: Quality Evaluatian
质检1	重复性	一致
质检2	阴性对照	无条带
	SNP	Call Rate（%）	Test for HWE (P Value)	MAF（本实验数据）		MAF(HapMap-HCB)
质检3(HWE TEST)	rs10045431	99.1948	0.0972	A	0.1	A	0.128
	rs10118795	98.1481	1	T	0.408	T	0.471
	rs1048274	99.1948	0.4879	G	0.478(A=0.522)	A	0.485
	rs10975519	99.3559	0.445	C	0.475(T=0.525)	T	0.5
	rs11167764	99.0338	0.2346	A	0.145	A	0.165
	rs16924144	99.2754	0.3378	C	0.329	C	0.31
	rs16924159	99.2754	0.4365	A	0.3	A	0.31
	rs1801876	99.0338	0.0724	G	0.338	G	0.353
	rs1891385	99.1948	0.7087	C	0.283	C	0.248
	rs1929992	99.0338	0.8839	T	0.443	T	0.489
	rs2171497	99.1143	0.0797	C	0.338	C	0.35
	rs2210463	99.2754	0.2995	G	0.399	G	0.464
	rs3212227	99.3559	0.9503	G	0.434	G	0.42
	rs4758994	99.2754	0.8015	G	0.281	/	/
	rs6556412	99.1948	0.797	A	0.428	A	0.398
	rs6556416	99.3559	0.4867	A	0.097	A	0.136
	rs6871626	99.2754	0.4699	A	0.31	A	0.292
	rs6887695	99.3559	0.5909	C	0.414	C	0.393
	rs7709212	99.3559	0.2039	C	0.451	C	0.423
	rs997173	99.3559	0.9276	C	0.359	C	0.358
